# Supplementary material for: A green approach for enhancing the hydrophobicity of UiO-66(Zr) catalysts for biodiesel production at 298 K
Source: Royal Society of Chemistry journal article supplement (doi:10.1039/d0ra08217a), 2020-01-01
Supplement: d0ra08217a1.pdf [file d0ra08217a1.pdf]

# A green approach for enhancing hydrophobicity of UiO-66(Zr) catalysts for biodiesel production at 298 K

*Ahmed S. Abou- Elyazed<sup>a,b</sup>, Yinyong Sun<sup>a\*</sup>, Ahmed M. El-Nahas<sup>b\*</sup>, Ahmed M. Yousif<sup>b,c</sup>*

<sup>a</sup>MIT Key Laboratory of Critical Materials Technology for New Energy Conversion and Storage, School of Chemistry and Chemical Engineering, Harbin Institute of Technology, Harbin, 150001, China.

<sup>b</sup>Chemistry Department, Faculty of Science, Menoufia University, Shebin El-Kom, Egypt.

<sup>c</sup>Chemistry Department, College of Science and Arts, Jouf University, Alqurayyat, KSA.

\*Corresponding author: [yysun@hit.edu.cn](mailto:yysun@hit.edu.cn), Tel: (+86)-45186413708  
[amelnahas@hotmail.com](mailto:amelnahas@hotmail.com), Tel: (+2)-01064607974

**Table S1.** Texture and crystallinity features of UiO-66(Zr)-green, 10SA/ UiO-66(Zr).

| <b>Samples</b>   | <b>Crystallinity degree (%)</b> | <b>Crystallite size (D<sub>nm</sub>)</b> | <b><sup>A</sup>Total acidity (sites/g)</b> | <b><sup>B</sup>Acid site density (sites/m<sup>2</sup>)</b> |
|------------------|---------------------------------|------------------------------------------|--------------------------------------------|------------------------------------------------------------|
| UiO-66(Zr)-green | 86.47                           | 536.586                                  | 3.80                                       | 5.42                                                       |
| 10SA/ UiO-66(Zr) | 84.43                           | 133.72                                   | 4.26                                       | 3.70                                                       |

<sup>A</sup>Total acidity x10<sup>21</sup>, <sup>B</sup> acid sites density x10<sup>18</sup>.

**Table S2.** Textural and physicochemical properties of various samples.

| <b>Samples</b>           | <b>Content of stearic acid (%)<sup>a</sup></b> | <b>BET surface area (m<sup>2</sup> g<sup>-1</sup>)</b> | <b>Langmuir surface area (m<sup>2</sup> g<sup>-1</sup>)</b> | <b>Pore volume (cm<sup>3</sup> g<sup>-1</sup>)</b> |
|--------------------------|------------------------------------------------|--------------------------------------------------------|-------------------------------------------------------------|----------------------------------------------------|
| UiO-66(Zr)-green         | --                                             | 701                                                    | 945                                                         | 0.68                                               |
| 10SA/ UiO-66(Zr)         | 10                                             | 1150                                                   | 1489                                                        | 0.92                                               |
| 10SA/ UiO-66(Zr)-solvent | 10                                             | 649                                                    | 933                                                         | 0.49                                               |

<sup>a</sup>Addition amount of stearic acid.

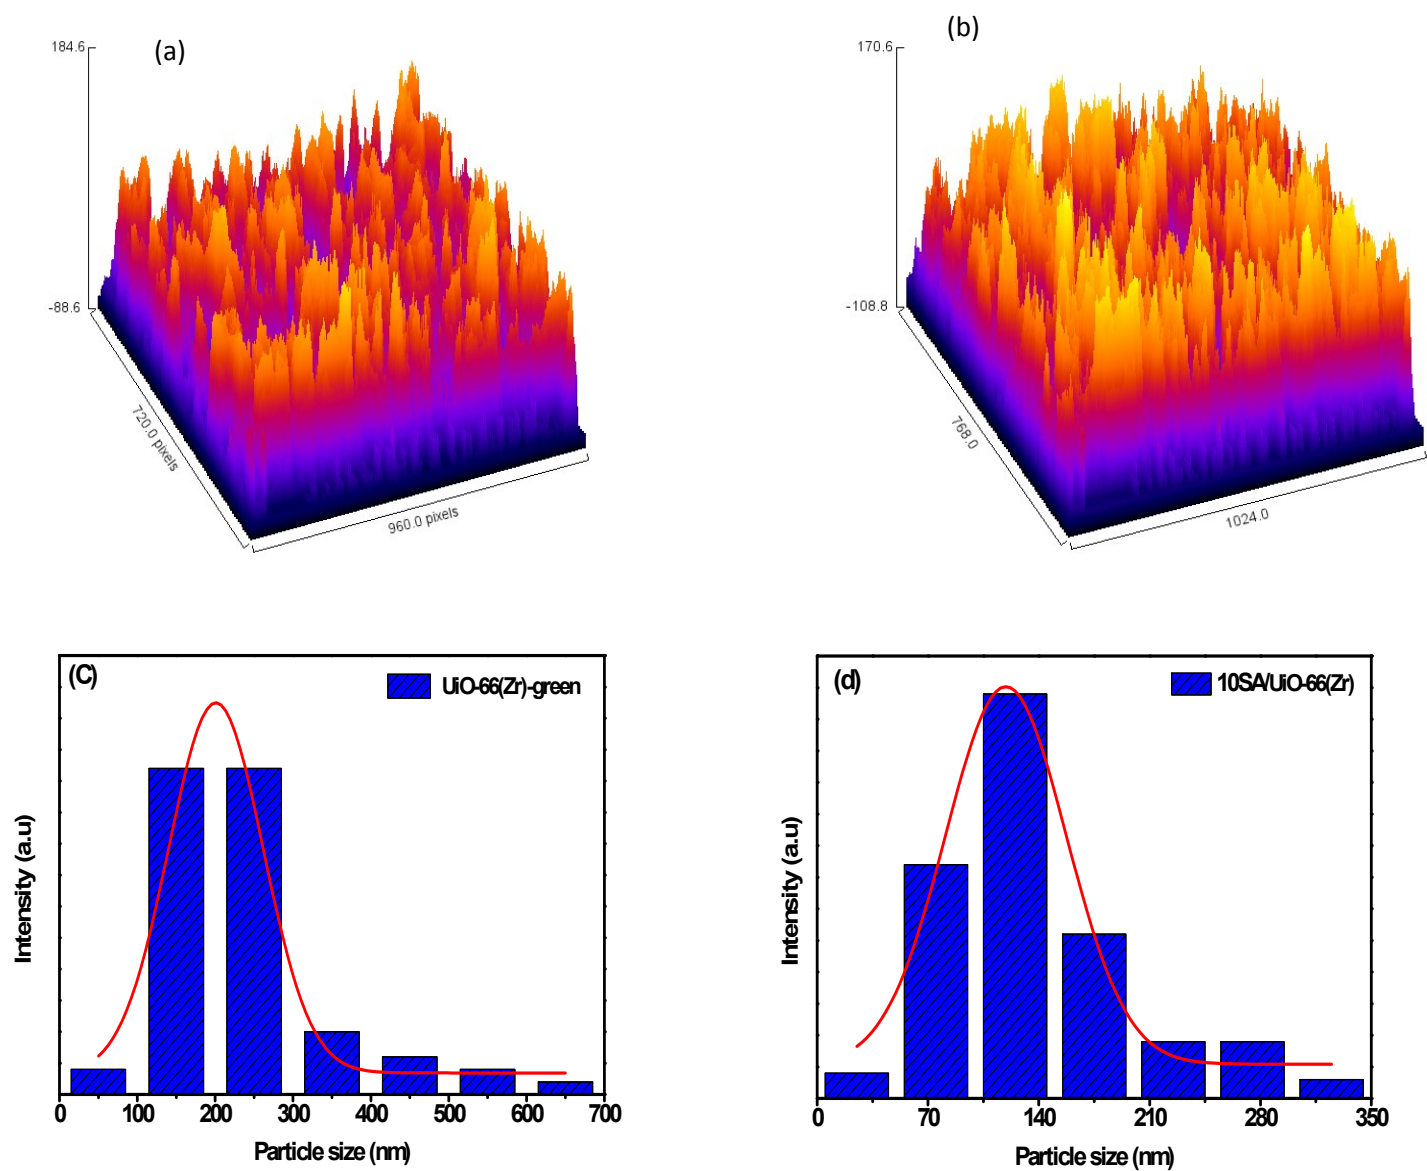

**Fig. S1.** The plot of surface roughness for UiO-66(Zr)-green (a), 10SA/UiO-66(Zr) (b) and the particle size distribution for UiO-66(Zr)-green (c) and 10SA/UiO-66(Zr) (d).

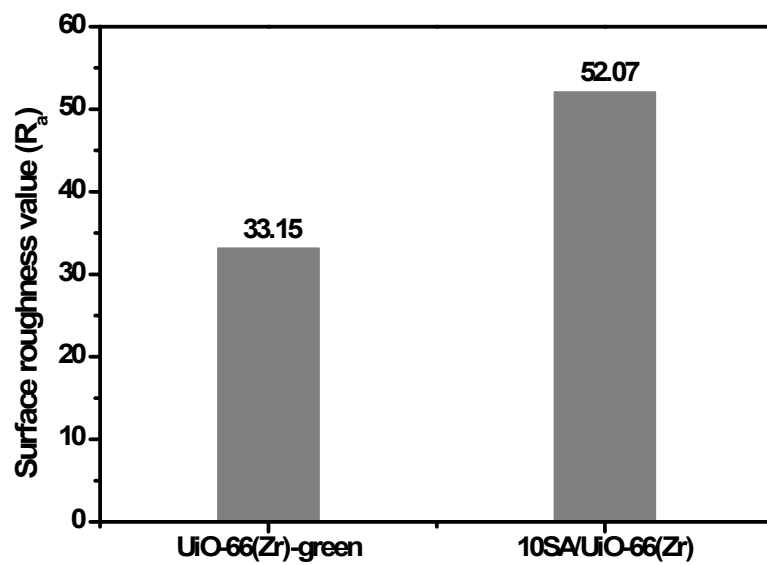

Fig. S2. Surface roughness value ( $R_a$ ) for UiO-66(Zr)-green and 10SA/ UiO-66(Zr).

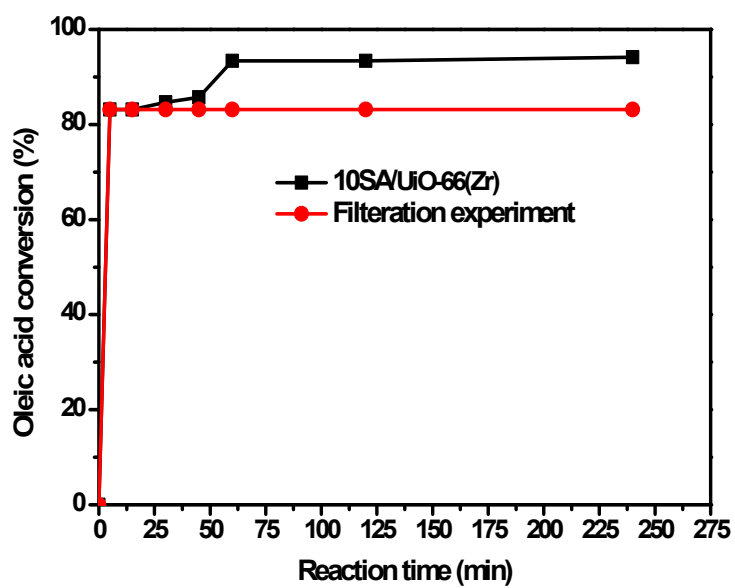

Fig. S3. Leaching test about 10SA/UiO-66(Zr) in the reaction of oleic acid with methanol.

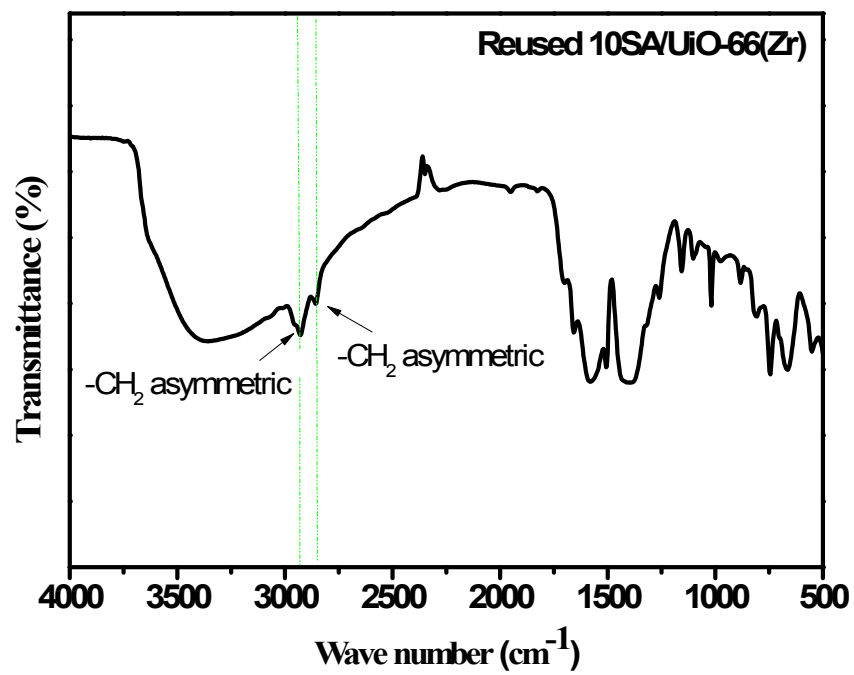

Fig. S4. FT-IR spectroscopy of the reused 10SA/UiO-66(Zr) catalyst.
